# Supplementary material for: 1,2-Bis(5-(trinitromethyl)-1,2,4-oxadiazol-3-yl)diazene: a water stable, high-performing green oxidizer
Source: Royal Society of Chemistry journal article supplement (doi:10.1039/d1dt03496k), 2021-01-01
Supplement: d1dt03496k1.pdf [file d1dt03496k1.pdf]

## Electronic Supplementary Information

for

# 1,2-Bis(5-(trinitromethyl)-1,2,4-oxadiazol-3-yl)diazene: A Water Stable, High-Performing Green Oxidizer

Ajay Kumar Chinnam,<sup>‡</sup> Richard J. Staples,<sup>‡</sup> Jean'ne M. Shreeve\*<sup>‡</sup>

<sup>‡</sup> Department of Chemistry, University of Idaho, Moscow, ID 83844-2343 USA, E-mail: [jshreeve@uidaho.edu](mailto:jshreeve@uidaho.edu)

<sup>‡</sup> Department of Chemistry, Michigan State University, East Lansing, Michigan 48824, USA

### Table of Contents

|                                              |     |
|----------------------------------------------|-----|
| 1. Experimental Section                      | S2  |
| 2. Theoretical Calculations                  | S2  |
| 3. X-ray crystallographic data for <b>14</b> | S4  |
| 4. NMR and FTIR spectroscopy                 | S10 |
| 5. DSC Plots                                 | S12 |

## 1. Experimental Section

*Caution!* Although no explosions or detonations occurred during the preparation or handling of these nitrogen-rich compounds, appropriate safety precautions (protective gloves and coats, face shield and explosion-proof baffle) must be followed to ensure safety.

### General Information

Reagents were purchased from Aldrich and Acros Organics and were used as received.  $^1\text{H}$ ,  $^{13}\text{C}$  and  $^{15}\text{N}$  NMR spectra were recorded on a 500 MHz (Bruker AVANCE 500) nuclear magnetic resonance spectrometer operating at 500, 125, and 50.69 MHz, respectively, by using DMSO- $d_6$  or acetone- $d_6$  or chloroform- $d$  or acetonitrile- $d_3$  as the solvent and locking solvent. Tetramethyl silane, and nitromethane are used as references for  $^1\text{H}$ ,  $^{13}\text{C}$ , and  $^{15}\text{N}$ , respectively, NMR spectra. The melting and decomposition (onset) points were obtained on a differential scanning calorimeter (TA Instruments Co., model Q2000) at a scan rate of  $5\text{ }^\circ\text{C min}^{-1}$ . IR spectra were recorded using KBr pellets for solids on a Nicolet Thermo-model AVATAR 370-spectrometer. Density was measured at room temperature by employing a Micromeritics AccuPyc II 1340 gas pycnometer. Elemental analyses (C, H, N) were determined using a Vario Micro-cube Elementar Analyser. The sensitivities to impact (IS) and friction (FS) were determined according to BAM standards.

**Synthesis of Compound 14:** Compound **13**<sup>1</sup> (430 mg, 1.05 mmol) was dissolved in concentrated  $\text{H}_2\text{SO}_4$  (3.0 mL) and cooled to  $-5\text{ }^\circ\text{C}$ . To this fuming  $\text{HNO}_3$  (1.5 mL) was added dropwise over 30 minutes. The temperature of this reaction was kept below  $0\text{ }^\circ\text{C}$  during this addition. After that, the reaction mixture was stirred at ice temperature for 1 hour and at room temperature for 2 hours. A yellow precipitate formed, and the reaction mixture was poured into ice-cold water. The precipitate was collected by filtration and washed with cold water (2.0 mL) and dried at room temperature to give a pure yellow solid compound **5** (455 mg, 93%).  $T_{\text{dec}}$  ( $5\text{ }^\circ\text{C min}^{-1}$ ):  $125\text{ }^\circ\text{C}$  (onset);  $^{13}\text{C}$  NMR (125 MHz, acetone- $d_6$ ):  $\delta$  175.9, 164.4, 118.9;  $^{15}\text{N}$  NMR (50.66 MHz, acetone- $d_6$ ):  $\delta$  +143.6, +4.0, -40.4, -130.6; IR (KBr):  $\nu$  3429, 2888, 1614 (C=N), 1495 ( $\text{NO}_2$ ), 1334 (C-N), 1275 (C-O), 1092, 1020, 961, 938, 840, 797, 767, 725, 662  $\text{cm}^{-1}$ . Anal. Calcd for  $\text{C}_6\text{N}_{12}\text{O}_{14}$  (436.96): C, 15.53; H, 0.00; N, 36.21; found: C, 15.50; H, 0.214; N, 35.83.

## 2. Theoretical Calculations

Heats of formation for compounds **14**, was calculated based on isodesmic reactions (Scheme S1). The calculations were carried out using Gaussian 03 (Revision D.01) suite of programs.<sup>2</sup> The geometric optimization and frequency analyses of the structures were calculated using B3LYP/6-31+G\*\* level. The gas phase enthalpy of formation was calculated, and the enthalpy of reaction was obtained by combining the MP2/6-311++G\*\* energy difference for the reactions, the scaled zero-point energies (ZPE), values of thermal correction (HT), and other thermal factors.

## Isodesmic Reactions

### Scheme S1.

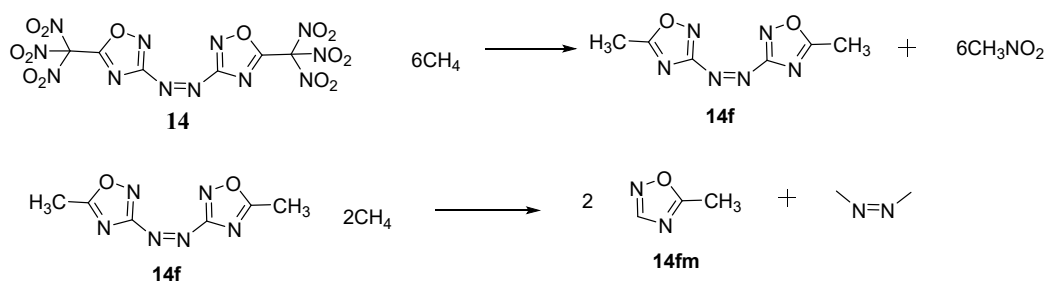

**Table S1** Calculated zero point energy (ZPE), values of the correction (Hr), total energy (E0) and gas-state heats of formation (HOF).<sup>a</sup>

| Compound    | ZPE [Hartree /Particle] | HT [Hartree /Particle] | E0 [kJ mol <sup>-1</sup> ] | HOF (gas) [kJ mol <sup>-1</sup> ] |
|-------------|-------------------------|------------------------|----------------------------|-----------------------------------|
| <b>14</b>   | 0.148746                | 0.177314               | -1933.9127816              | 461.414                           |
| <b>14f</b>  | 0.137505                | 0.150788               | -709.3940216               | 295.552                           |
| <b>14fm</b> | 0.074089                | 0.080182               | -300.6855029               | 17.0516                           |

<sup>a</sup> The enthalpy of sublimation was calculated by using Trouton's rule. Solid-state heats of formation of the resulting compounds were calculated with Equation (1) in which  $T_m$  is the melting temperature.

$$\Delta\text{Hf} = \Delta\text{Hf}(\text{g}) - \Delta\text{Hsub} = \Delta\text{Hf}(\text{g}) - 188[\text{J mol}^{-1} \text{K}^{-1}] \times T_m \quad (1)$$

## References

1. Y. Tang, C. He, G. H. Imler, D. A. Parrish and J. M. Shreeve, *Chem. Eur. J.* 2017, **23**, 16401–16407.
2. M. J. Frisch, G. W. Trucks, H. B. Schlegel, G. E. Scuseria, M. A. Robb, J. R. Cheeseman, J. A. Montgomery Jr., T. Vreven, K. N. Kudin, J. C. Burant, J. M. Millam, S. S. Iyengar, J. Tomasi, V. Barone, B. Mennucci, M. Cossi, G. Scalmani, N. Rega, G. A. Petersson, H. Nakatsuji, M. Hada, M. Ehara, K. Toyota, R. Fukuda, J. Hasegawa, M. Ishida, T. Nakajima, Y. Honda, O. Kitao, H. Nakai, M. Klene, X. Li, J. E. Knox, H. P. Hratchian, J. B. Cross, V. Bakken, C. Adamo, J. Jaramillo, R. Gomperts, R. E. Stratmann, O. Yazyev, A. J. Austin, R. Cammi, C. Pomelli, J. W. Ochterski, P. Y. Ayala, K. Morokuma, G. A. Voth, P. Salvador, J. J. Dannenberg, V. G. Zakrzewski, S. Dapprich, A. D. Daniels, M. C. Strain, O. Farkas, D. K. Malick, A. D. Rabuck, K. Raghavachari, J. B. Foresman, J. V. Ortiz, Q. Cui, A. G. Baboul, S. Clifford, J. Cioslowski, B. B. Stefanov, G. Liu, A. Liashenko, P. Piskorz, I. Komaromi, R. L. Martin, D. J. Fox, T. Keith, M. A. Al-Laham, C. Y. Peng, A. Nanayakkara, M. Challacombe, P. M. W. Gill, B. Johnson, W. Chen, M. W. Wong, C. Gonzalez and J. A. Pople, Gaussian 03 (Revision E.01), Gaussian, Inc., Wallingford CT, 2004.

### 3. X-ray crystallographic data

| Table S2. Selected crystal parameters of <b>14</b> | <b>14</b>                                      |
|----------------------------------------------------|------------------------------------------------|
| CCDC                                               | <b>2106963</b>                                 |
| Empirical formula                                  | C <sub>6</sub> N <sub>12</sub> O <sub>14</sub> |
| Formula mass                                       | 464.18                                         |
| Crystal System                                     | triclinic                                      |
| Space Group                                        | <i>P</i> -1                                    |
| <i>Z</i>                                           | 2                                              |
| <i>a</i> /Å                                        | 5.92194(16)                                    |
| <i>b</i> /Å                                        | 11.2781(3)                                     |
| <i>c</i> /Å                                        | 12.7041(4)                                     |
| $\alpha$ /°                                        | 106.137(2)                                     |
| $\beta$ /°                                         | 92.992(2)                                      |
| $\gamma$ /°                                        | 92.277(2)                                      |
| <i>V</i> /Å <sup>3</sup>                           | 812.64(4)                                      |
| <i>D</i> <sub>calc.</sub> / g cm <sup>-3</sup>     | 1.897                                          |
| <i>T</i> /K                                        | 100(10)                                        |
| F(000)                                             | 464.0                                          |
| <i>h, k, l</i>                                     | 7,14,15                                        |
| $\mu$ (mm <sup>-1</sup> )                          | 1.691                                          |
| <i>R</i> 1 [ <i>I</i> > 2 $\sigma$ ( <i>I</i> )]   | 0.0660                                         |
| Completeness to theta full                         | 0.951                                          |
| <i>wR</i> 2 (all data)                             | 0.1903                                         |
| <i>S</i> on F2                                     | 1.057                                          |

### Compound 14

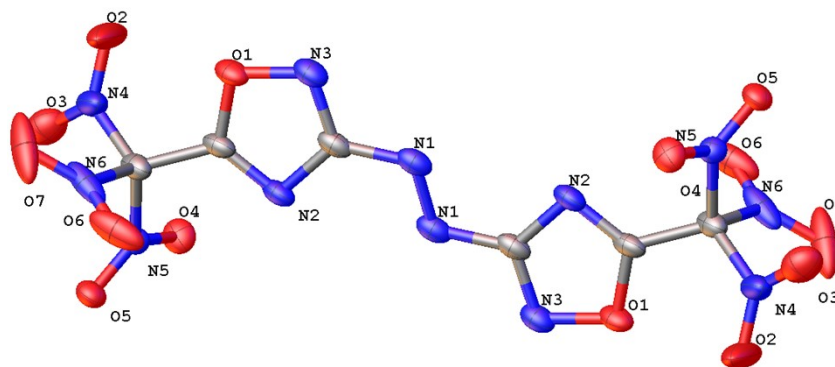

Figure S1: Molecular structure of **14**

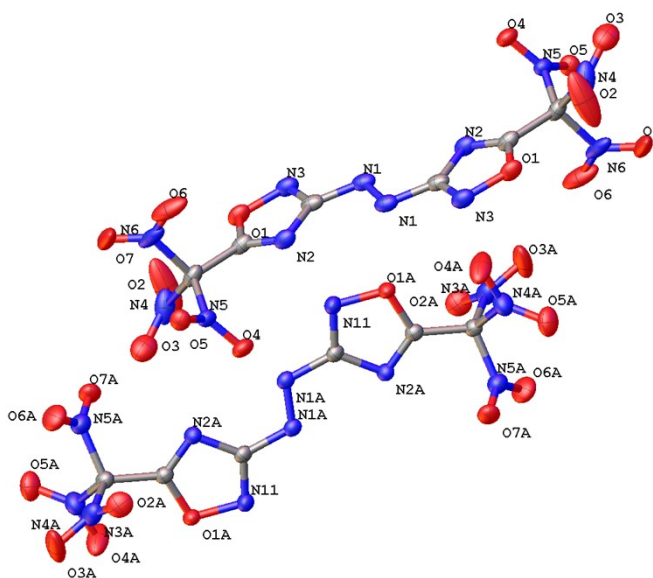

**Figure S2:** Single-crystal X-ray structure of **14**

**Table S3:** Fractional Atomic Coordinates ( $\times 10^4$ ) and Equivalent Isotropic Displacement Parameters ( $\text{\AA}^2 \times 10^3$ ) for **14**.  $U_{eq}$  is defined as 1/3 of the trace of the orthogonalised  $U_{ij}$ .

| Atom | x        | y       | z          | $U_{eq}$ |
|------|----------|---------|------------|----------|
| O1   | -1903(4) | 2395(2) | 6231.9(18) | 29.3(5)  |
| O2   | -564(10) | 653(4)  | 7108(3)    | 108(2)   |
| O3   | 2306(5)  | 1020(2) | 8264(3)    | 46.1(7)  |
| O4   | 4450(4)  | 2989(2) | 7537(2)    | 31.5(5)  |
| O5   | 3422(4)  | 3848(2) | 9190.8(18) | 28.3(5)  |
| O6   | -1208(5) | 4318(4) | 8904(2)    | 57.9(9)  |
| O7   | -1653(5) | 2516(4) | 9217(3)    | 75.1(13) |
| N1   | -832(4)  | 4619(2) | 4901(2)    | 27.2(6)  |
| N2   | 658(4)   | 3962(3) | 6513(2)    | 26.8(6)  |
| N3   | -2378(4) | 2977(3) | 5419(2)    | 29.6(6)  |
| N4   | 836(7)   | 1320(3) | 7725(3)    | 45.9(9)  |
| N5   | 3094(4)  | 3261(2) | 8241(2)    | 23.0(5)  |
| N6   | -890(5)  | 3229(4) | 8761(2)    | 45.0(9)  |
| C1   | -819(5)  | 3874(3) | 5619(2)    | 25.8(6)  |
| C2   | -93(5)   | 3041(3) | 6829(2)    | 25.9(7)  |
| C3   | 702(5)   | 2711(3) | 7844(3)    | 27.8(7)  |
| O1A  | 2531(3)  | 2500(2) | 3813.3(18) | 25.3(5)  |
| O2A  | 2211(4)  | 666(2)  | 1199(2)    | 38.9(6)  |
| O3A  | 2118(5)  | 2404(4) | 731(3)     | 68.7(11) |
| O4A  | 3531(6)  | 4300(3) | 2913(3)    | 61.0(10) |
| O5A  | 6152(5)  | 4021(2) | 1734(2)    | 42.1(6)  |
| O6A  | 6859(5)  | 1151(3) | 822(2)     | 43.7(7)  |
| O7A  | 8484(4)  | 2205(2) | 2435(2)    | 36.1(6)  |
| N1A  | 4185(4)  | 340(2)  | 5120(2)    | 21.1(5)  |
| N2A  | 5064(4)  | 1064(2) | 3489(2)    | 21.1(5)  |
| N3A  | 2769(5)  | 1722(3) | 1264(2)    | 37.4(7)  |
| N4A  | 4822(5)  | 3685(3) | 2303(3)    | 36.1(7)  |
| N5A  | 6893(5)  | 1807(3) | 1757(2)    | 31.2(6)  |

| Atom | x       | y       | z       | $U_{eq}$ |
|------|---------|---------|---------|----------|
| N11  | 2361(4) | 1897(2) | 4631(2) | 25.3(6)  |
| C1A  | 3899(5) | 1081(3) | 4400(2) | 20.1(6)  |
| C2A  | 4158(5) | 1940(3) | 3188(2) | 21.1(6)  |
| C3A  | 4636(5) | 2311(3) | 2177(2) | 22.9(6)  |

**Table S4:** Anisotropic Displacement Parameters ( $\times 10^4$ ) for **14**. The anisotropic displacement factor exponent takes the form:  $-2\pi^2[h^2a^{*2} \times U_{11} + \dots + 2hka^* \times b^* \times U_{12}]$

| Atom | $U_{11}$ | $U_{22}$ | $U_{33}$ | $U_{23}$  | $U_{13}$  | $U_{12}$  |
|------|----------|----------|----------|-----------|-----------|-----------|
| O1   | 19.3(10) | 38.7(12) | 24.2(11) | 1.1(9)    | -0.5(8)   | -6.1(9)   |
| O2   | 169(5)   | 75(2)    | 80(3)    | 51(2)     | -81(3)    | -89(3)    |
| O3   | 50.6(17) | 33.2(13) | 52.0(17) | 6.2(12)   | 11.9(14)  | 3.4(12)   |
| O4   | 20.9(10) | 41.6(13) | 32.5(12) | 10.0(10)  | 8.1(9)    | 4.5(9)    |
| O5   | 25.5(11) | 33.9(12) | 23.1(11) | 5.7(9)    | -3.9(8)   | -3.8(9)   |
| O6   | 26.7(13) | 89(2)    | 34.6(15) | -22.3(15) | 4.6(11)   | 6.3(14)   |
| O7   | 30.6(14) | 171(4)   | 54(2)    | 76(2)     | 19.8(13)  | 30.4(19)  |
| N1   | 20.1(11) | 31.9(13) | 22.8(13) | -3.6(10)  | 0.0(9)    | 4.4(9)    |
| N2   | 21.0(12) | 34.8(14) | 18.6(12) | -1.4(10)  | -1.2(10)  | -1.6(10)  |
| N3   | 20.7(12) | 38.6(15) | 23.9(13) | 0.3(11)   | -0.9(10)  | 0.3(11)   |
| N4   | 66(2)    | 41.4(18) | 23.7(15) | 3.9(13)   | -0.7(15)  | -28.1(17) |
| N5   | 18.5(12) | 24.8(12) | 25.0(13) | 6.2(10)   | 1.7(10)   | 0.3(9)    |
| N6   | 15.2(13) | 95(3)    | 18.2(14) | 4.9(16)   | 0.8(10)   | 4.5(15)   |
| C1   | 18.3(13) | 31.8(16) | 20.1(14) | -4.4(12)  | 0.3(11)   | 3.7(12)   |
| C2   | 19.5(13) | 32.3(16) | 19.0(14) | -4.0(12)  | 2.5(11)   | -3.8(12)  |
| C3   | 22.4(14) | 36.5(17) | 20.1(15) | 1.4(12)   | 3.8(12)   | -6.7(12)  |
| O1A  | 21.8(10) | 33.0(11) | 24.6(11) | 12.3(9)   | 6.4(8)    | 8.4(8)    |
| O2A  | 38.7(14) | 36.5(14) | 32.7(13) | -2.2(10)  | -5.5(10)  | -6.6(11)  |
| O3A  | 43.8(16) | 124(3)   | 60(2)    | 69(2)     | -22.3(15) | -25.3(18) |
| O4A  | 95(3)    | 35.6(14) | 65(2)    | 23.2(14)  | 52.1(19)  | 31.0(15)  |
| O5A  | 53.8(16) | 37.4(14) | 36.8(14) | 14.4(11)  | 4.2(12)   | -9.5(12)  |
| O6A  | 49.4(16) | 49.0(15) | 29.5(13) | 2.6(11)   | 14.2(11)  | 11.1(12)  |
| O7A  | 19.7(11) | 53.3(15) | 38.4(14) | 19.1(12)  | -2.4(10)  | -0.5(10)  |
| N1A  | 19.0(11) | 22.8(12) | 19.8(12) | 3.2(9)    | 1.6(9)    | -0.8(9)   |
| N2A  | 21.2(12) | 23.6(12) | 17.7(12) | 4.1(9)    | 1.6(9)    | 2.5(9)    |
| N3A  | 28.9(14) | 60(2)    | 24.4(14) | 13.3(14)  | 0.1(11)   | -0.6(13)  |
| N4A  | 43.5(17) | 36.0(16) | 32.2(15) | 14.1(13)  | 4.3(13)   | 7.0(13)   |
| N5A  | 28.9(14) | 35.4(15) | 30.6(15) | 10.4(12)  | 5.4(11)   | 3.8(11)   |
| N11  | 23.4(12) | 30.5(13) | 24.9(13) | 11.4(11)  | 5.4(10)   | 3.7(10)   |
| C1A  | 17.1(12) | 21.4(13) | 19.8(13) | 2.8(11)   | 1.2(10)   | -1.8(10)  |
| C2A  | 18.8(13) | 23.2(14) | 18.7(14) | 2.2(11)   | -0.3(10)  | 0.0(11)   |
| C3A  | 21.0(14) | 27.7(15) | 18.8(14) | 4.4(11)   | 0.4(11)   | 2.2(11)   |

**Table S5:** Bond Lengths in Å for **14**.

| Atom | Atom | Length/Å |
|------|------|----------|
| O1   | N3   | 1.392(4) |
| O1   | C2   | 1.342(4) |
| O2   | N4   | 1.193(5) |
| O3   | N4   | 1.196(5) |
| O4   | N5   | 1.217(3) |

| Atom | Atom             | Length/Å |
|------|------------------|----------|
| O5   | N5               | 1.205(3) |
| O6   | N6               | 1.213(5) |
| O7   | N6               | 1.202(5) |
| N1   | N1 <sup>1</sup>  | 1.249(5) |
| N1   | C1               | 1.401(4) |
| N2   | C1               | 1.375(4) |
| N2   | C2               | 1.285(4) |
| N3   | C1               | 1.303(4) |
| N4   | C3               | 1.539(5) |
| N5   | C3               | 1.526(4) |
| N6   | C3               | 1.539(4) |
| C2   | C3               | 1.497(5) |
| O1A  | N11              | 1.396(3) |
| O1A  | C2A              | 1.344(3) |
| O2A  | N3A              | 1.202(4) |
| O3A  | N3A              | 1.219(4) |
| O4A  | N4A              | 1.213(4) |
| O5A  | N4A              | 1.214(4) |
| O6A  | N5A              | 1.210(4) |
| O7A  | N5A              | 1.224(4) |
| N1A  | N1A <sup>2</sup> | 1.254(5) |
| N1A  | C1A              | 1.409(4) |
| N2A  | C1A              | 1.374(4) |
| N2A  | C2A              | 1.281(4) |
| N3A  | C3A              | 1.546(4) |
| N4A  | C3A              | 1.512(4) |
| N5A  | C3A              | 1.537(4) |
| N11  | C1A              | 1.307(4) |
| C2A  | C3A              | 1.494(4) |

---- <sup>1</sup>-x,1-y,1-z; <sup>2</sup>1-x,-y,1-z

**Table S6:** Bond Angles in ° for **14**.

| Atom            | Atom | Atom | Angle/°  |
|-----------------|------|------|----------|
| C2              | O1   | N3   | 105.1(2) |
| N1 <sup>1</sup> | N1   | C1   | 112.2(3) |
| C2              | N2   | C1   | 100.6(3) |
| C1              | N3   | O1   | 103.6(2) |
| O2              | N4   | O3   | 126.8(4) |
| O2              | N4   | C3   | 116.1(4) |
| O3              | N4   | C3   | 117.1(3) |
| O4              | N5   | C3   | 113.3(2) |
| O5              | N5   | O4   | 128.8(3) |
| O5              | N5   | C3   | 117.8(2) |
| O6              | N6   | C3   | 113.7(3) |
| O7              | N6   | O6   | 129.5(4) |
| O7              | N6   | C3   | 116.8(4) |
| N2              | C1   | N1   | 128.0(3) |
| N3              | C1   | N1   | 116.7(3) |
| N3              | C1   | N2   | 115.3(3) |
| O1              | C2   | C3   | 117.9(3) |
| N2              | C2   | O1   | 115.4(3) |
| N2              | C2   | C3   | 126.4(3) |
| N5              | C3   | N4   | 104.7(3) |

| Atom             | Atom | Atom | Angle/°  |
|------------------|------|------|----------|
| N5               | C3   | N6   | 108.3(2) |
| N6               | C3   | N4   | 107.4(3) |
| C2               | C3   | N4   | 115.8(3) |
| C2               | C3   | N5   | 111.0(2) |
| C2               | C3   | N6   | 109.3(3) |
| C2A              | O1A  | N11  | 105.3(2) |
| N1A <sup>2</sup> | N1A  | C1A  | 111.3(3) |
| C2A              | N2A  | C1A  | 100.6(2) |
| O2A              | N3A  | O3A  | 131.0(3) |
| O2A              | N3A  | C3A  | 114.4(3) |
| O3A              | N3A  | C3A  | 114.6(3) |
| O4A              | N4A  | O5A  | 128.3(3) |
| O4A              | N4A  | C3A  | 115.7(3) |
| O5A              | N4A  | C3A  | 115.8(3) |
| O6A              | N5A  | O7A  | 130.4(3) |
| O6A              | N5A  | C3A  | 117.3(3) |
| O7A              | N5A  | C3A  | 112.2(3) |
| C1A              | N11  | O1A  | 103.0(2) |
| N2A              | C1A  | N1A  | 127.9(3) |
| N11              | C1A  | N1A  | 116.3(3) |
| N11              | C1A  | N2A  | 115.7(3) |
| O1A              | C2A  | C3A  | 118.7(2) |
| N2A              | C2A  | O1A  | 115.4(3) |
| N2A              | C2A  | C3A  | 125.7(3) |
| N4A              | C3A  | N3A  | 108.0(3) |
| N4A              | C3A  | N5A  | 106.3(2) |
| N5A              | C3A  | N3A  | 107.2(2) |
| C2A              | C3A  | N3A  | 109.4(2) |
| C2A              | C3A  | N4A  | 116.1(2) |
| C2A              | C3A  | N5A  | 109.5(2) |

---- <sup>1</sup>-x,1-y,1-z; <sup>2</sup>1-x,-y,1-z

**Table S7:** Torsion Angles in ° for **14**.

| Atom | Atom | Atom | Atom | Angle/°   |
|------|------|------|------|-----------|
| O1   | N3   | C1   | N1   | 178.5(2)  |
| O1   | N3   | C1   | N2   | -1.0(3)   |
| O1   | C2   | C3   | N4   | 45.0(4)   |
| O1   | C2   | C3   | N5   | 164.2(2)  |
| O1   | C2   | C3   | N6   | -76.4(3)  |
| O2   | N4   | C3   | N5   | -156.6(4) |
| O2   | N4   | C3   | N6   | 88.4(4)   |
| O2   | N4   | C3   | C2   | -34.0(5)  |
| O3   | N4   | C3   | N5   | 24.2(4)   |
| O3   | N4   | C3   | N6   | -90.8(4)  |
| O3   | N4   | C3   | C2   | 146.7(3)  |
| O4   | N5   | C3   | N4   | 71.5(3)   |
| O4   | N5   | C3   | N6   | -174.1(3) |
| O4   | N5   | C3   | C2   | -54.1(3)  |
| O5   | N5   | C3   | N4   | -105.5(3) |
| O5   | N5   | C3   | N6   | 8.9(4)    |
| O5   | N5   | C3   | C2   | 128.9(3)  |
| O6   | N6   | C3   | N4   | -177.2(3) |



| Atom             | Atom | Atom | Atom | Angle/°   |
|------------------|------|------|------|-----------|
| O6               | N6   | C3   | N5   | 70.2(3)   |
| O6               | N6   | C3   | C2   | -50.8(4)  |
| O7               | N6   | C3   | N4   | 1.9(4)    |
| O7               | N6   | C3   | N5   | -110.7(3) |
| O7               | N6   | C3   | C2   | 128.3(3)  |
| N1 <sup>1</sup>  | N1   | C1   | N2   | 5.2(5)    |
| N1 <sup>1</sup>  | N1   | C1   | N3   | -174.1(3) |
| N2               | C2   | C3   | N4   | -141.7(3) |
| N2               | C2   | C3   | N5   | -22.5(4)  |
| N2               | C2   | C3   | N6   | 96.9(4)   |
| N3               | O1   | C2   | N2   | 0.2(3)    |
| N3               | O1   | C2   | C3   | 174.3(3)  |
| C1               | N2   | C2   | O1   | -0.8(3)   |
| C1               | N2   | C2   | C3   | -174.2(3) |
| C2               | O1   | N3   | C1   | 0.4(3)    |
| C2               | N2   | C1   | N1   | -178.3(3) |
| C2               | N2   | C1   | N3   | 1.1(3)    |
| O1A              | N11  | C1A  | N1A  | 178.0(2)  |
| O1A              | N11  | C1A  | N2A  | -1.0(3)   |
| O1A              | C2A  | C3A  | N3A  | -76.8(3)  |
| O1A              | C2A  | C3A  | N4A  | 45.7(4)   |
| O1A              | C2A  | C3A  | N5A  | 166.1(2)  |
| O2A              | N3A  | C3A  | N4A  | -169.1(3) |
| O2A              | N3A  | C3A  | N5A  | 76.8(3)   |
| O2A              | N3A  | C3A  | C2A  | -41.8(4)  |
| O3A              | N3A  | C3A  | N4A  | 11.1(4)   |
| O3A              | N3A  | C3A  | N5A  | -103.0(3) |
| O3A              | N3A  | C3A  | C2A  | 138.3(3)  |
| O4A              | N4A  | C3A  | N3A  | 86.0(4)   |
| O4A              | N4A  | C3A  | N5A  | -159.3(3) |
| O4A              | N4A  | C3A  | C2A  | -37.2(4)  |
| O5A              | N4A  | C3A  | N3A  | -89.9(3)  |
| O5A              | N4A  | C3A  | N5A  | 24.8(4)   |
| O5A              | N4A  | C3A  | C2A  | 146.9(3)  |
| O6A              | N5A  | C3A  | N3A  | 4.7(4)    |
| O6A              | N5A  | C3A  | N4A  | -110.5(3) |
| O6A              | N5A  | C3A  | C2A  | 123.3(3)  |
| O7A              | N5A  | C3A  | N3A  | -178.7(3) |
| O7A              | N5A  | C3A  | N4A  | 66.0(3)   |
| O7A              | N5A  | C3A  | C2A  | -60.2(3)  |
| N1A <sup>2</sup> | N1A  | C1A  | N2A  | 4.3(5)    |
| N1A <sup>2</sup> | N1A  | C1A  | N11  | -174.6(3) |
| N2A              | C2A  | C3A  | N3A  | 98.3(3)   |
| N2A              | C2A  | C3A  | N4A  | -139.2(3) |
| N2A              | C2A  | C3A  | N5A  | -18.8(4)  |
| N11              | O1A  | C2A  | N2A  | -0.1(3)   |
| N11              | O1A  | C2A  | C3A  | 175.4(2)  |
| C1A              | N2A  | C2A  | O1A  | -0.4(3)   |
| C1A              | N2A  | C2A  | C3A  | -175.7(3) |
| C2A              | O1A  | N11  | C1A  | 0.7(3)    |
| C2A              | N2A  | C1A  | N1A  | -178.0(3) |
| C2A              | N2A  | C1A  | N11  | 1.0(3)    |

----<sup>1</sup>-x,1-y,1-z; <sup>2</sup>1-x,-y,1-z

## 4. NMR and FTIR Spectroscopy

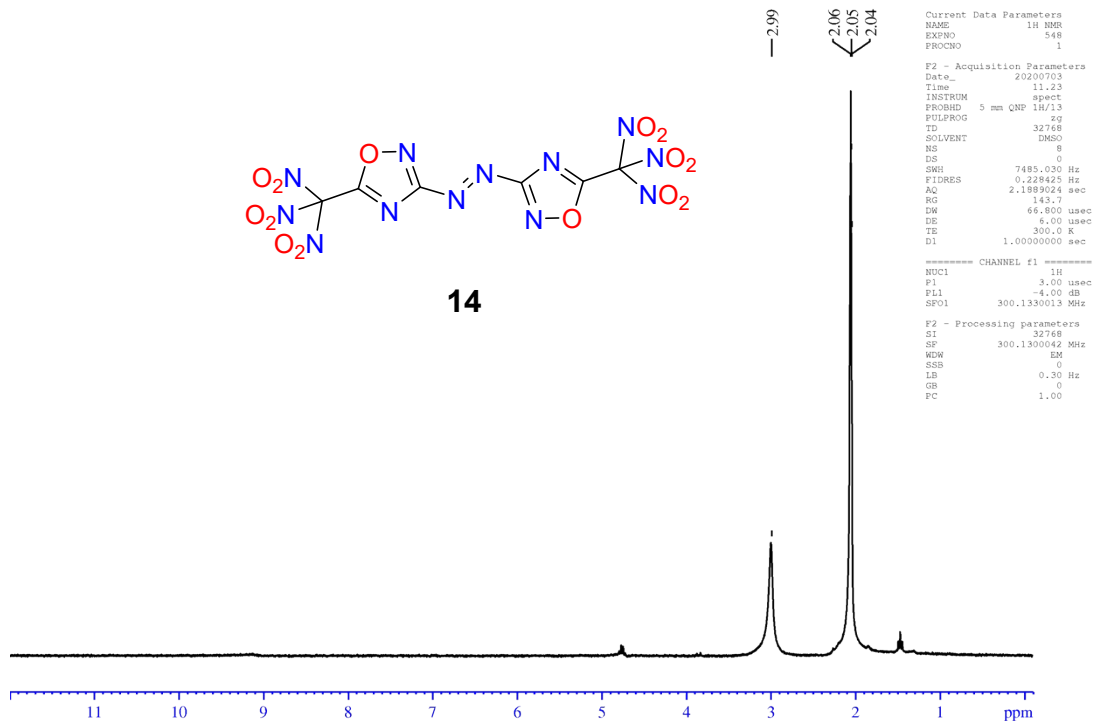

Figure S3. <sup>1</sup>H NMR spectrum of **14** in acetone-*d*<sub>6</sub>

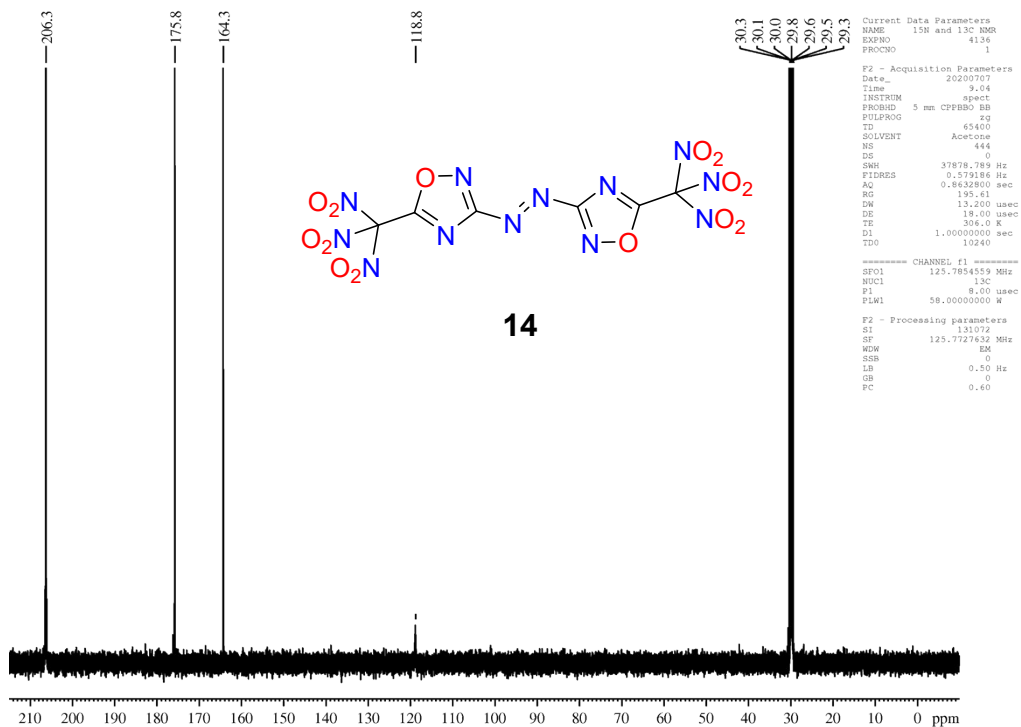

Figure S4. <sup>13</sup>C NMR spectrum of **14** in acetone-*d*<sub>6</sub>

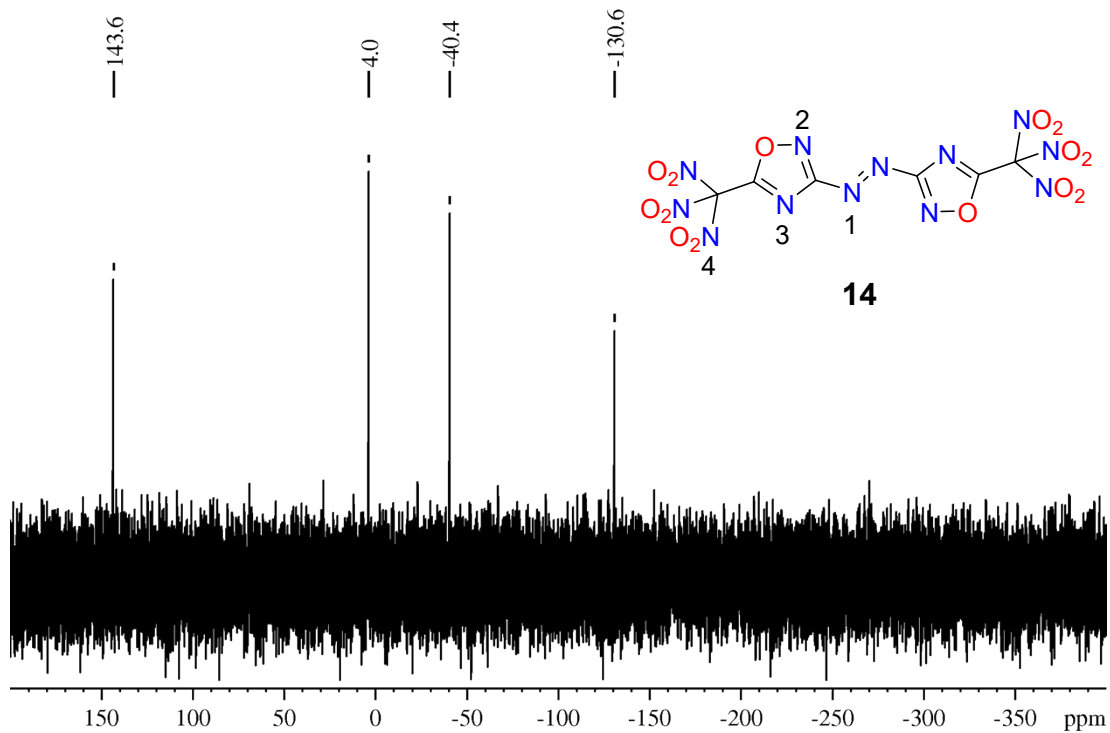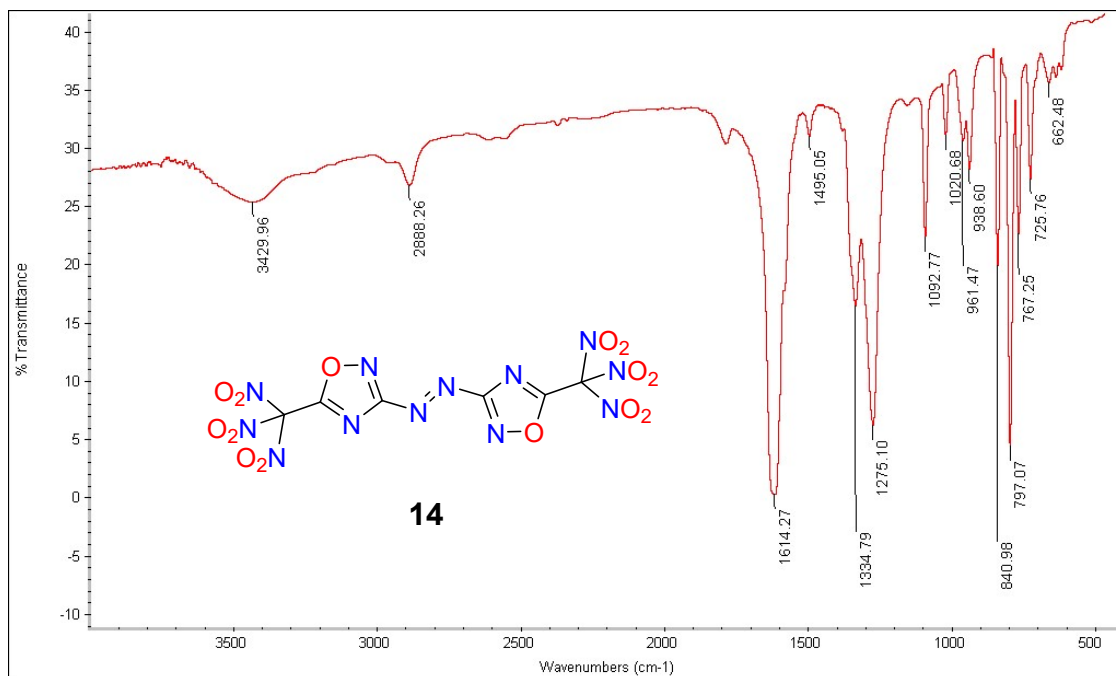

## 5. DSC Plots

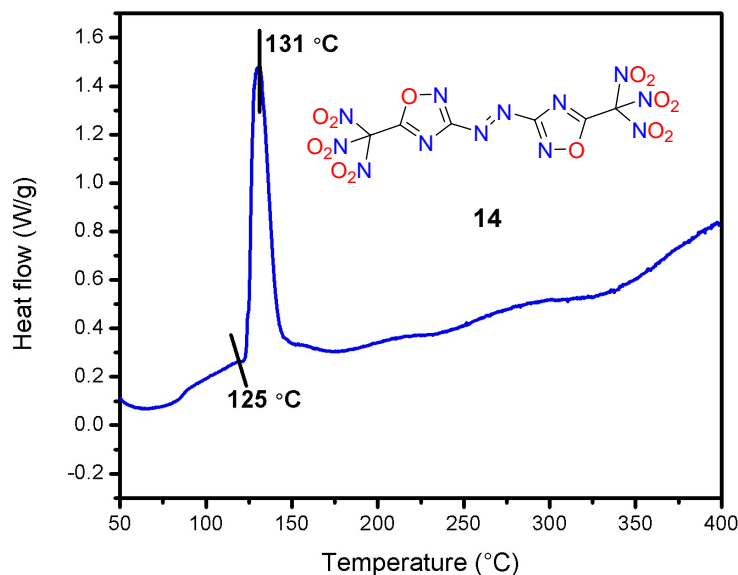

**Figure S7.** DSC thermogram of **14** at 5 °C per minute

**Hydrolytic Stability of compound 14 in water.** The stability of compound **14** in water was determined and the results are shown in the Figures S8-S10. Compound **14** (50 mg) was added to water (2.0 mL) and kept at room temperature until the water evaporated. Since compound **14** is insoluble in water, it doesn't hydrolyze to the carbonyl compound **14·Oxo** or any other side products. After the evaporation of water, a yellow solid product was collected and its thermostability was determined using DSC at the heating rate of 10 °C per minute. The DSC thermograms of pure compound **14** (Figure S9) and that of the yellow solid **14** from water (Figure S10) are almost identical.

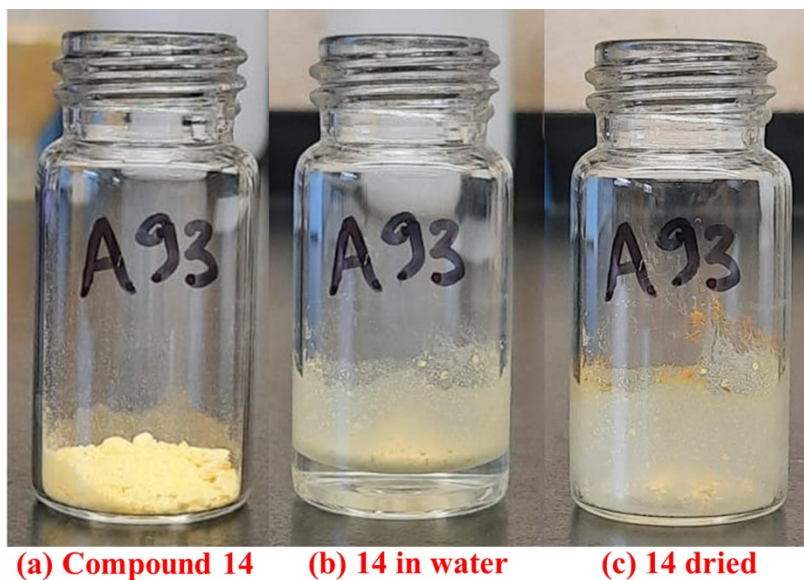

**Figure S8.** Stability test in water (a) Pure compound **14**; (b) Compound **14** in water; (c) Compound **14** after evaporation of water.

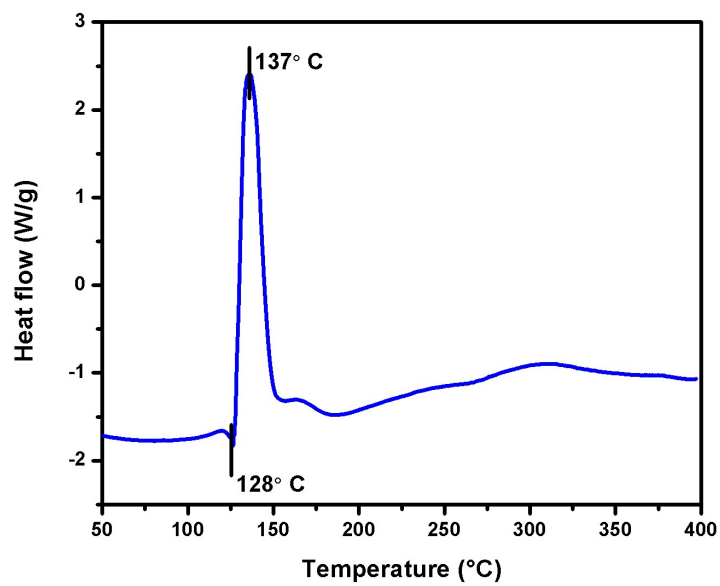

**Figure S9.** DSC thermogram of pure compound **14** at 10 °C per minute

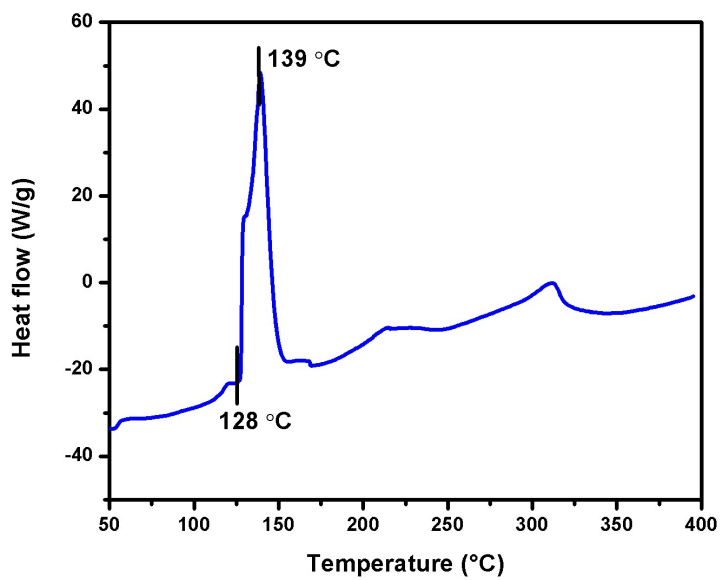

**Figure S10.** DSC thermogram of **14** (after drying from water) at 10 °C per minute
